# Supplementary material
Source: PubMed Central journal article supplement (PMC3276461)
Supplement: supp_M019752_Supplemental_Tables_1-5.pdf [file supp_M019752_Supplemental_Tables_1-5.pdf]

**Supplemental Table 1:** Effect of HFD on HDL composition in SHAM mice. **1)** Gene name of identified protein. **2)** Normalized spectra for SHAM-LFD mice  $\times 10^4$ . **3)** Normalized spectra for SHAM-HFD  $\times 10^4$ . **4)**  $\text{Log}_2$  (rate of SHAM-HFD/rate of SHAM-LFD) **5)** quasi p-value. **6)** Protein name / description.

**Supplemental Table 2:** Effect of HFD on HDL composition in OVX mice. **1)** Gene name of identified protein. **2)** Normalized spectra for OVX-LFD mice  $\times 10^4$ . **3)** Normalized spectra for OVX-HFD mice  $\times 10^4$ . **4)**  $\text{Log}_2$  (rate of OVX-HFD/rate of OVX-LFD). **5)** quasi p-value. **6)** Protein name / description.

**Supplemental Table 3:** Effect of OVX on HDL composition in LFD-fed mice. **1)** Gene name of identified protein **2)** Normalized spectra for SHAM-LFD mice  $\times 10^4$ . **3)** Normalized spectra for OVX-LFD mice  $\times 10^4$ . **4)**  $\text{Log}_2$  (rate of OVX-LFD/rate of SHAM-LFD) **5)** quasi p-value. **6)** Protein name / description.

**Supplemental Table 4:** Effect of OVX on HDL composition in HFD-fed mice. **1)** Gene name of identified protein. **2)** Normalized spectra for SHAM-HFD mice  $\times 10^4$ . **3)** Normalized spectra for OVX-HFD mice  $\times 10^4$ . **4)**  $\text{Log}_2$  (rate of OVX-HFD/rate of SHAM-HFD). **5)** quasi p-value. **6)** Protein name / description.

**Supplemental Table 5:** List of shared and unique proteins presented in the Venn Diagram (Fig 5).

| 1) Gene                                     | 2) SHAM-LFD | 3) SHAM-HFD | 4) log( <u>1/2</u> )                | 5) p-value | 6) Description                   |
|---------------------------------------------|-------------|-------------|-------------------------------------|------------|----------------------------------|
| <b>Lipoprotein / Lipid Transport</b>        |             |             |                                     |            |                                  |
| Apoa1                                       | 298.94      | 269.36      | -0.15                               | 0.63978    | Apolipoprotein A-I               |
| Apoa2                                       | 67.02       | 66.83       | 0.00                                | 0.99149    | Apolipoprotein A-II              |
| Apoa4                                       | 116.68      | 147.08      | 0.33                                | 0.01946    | Apolipoprotein A-IV              |
| Apoc1                                       | 1.93        | 1.46        | -0.40                               | 0.70796    | Apolipoprotein C-I               |
| Apoc2                                       | 6.27        | 18.09       | 1.53                                | 0.03054    | Apolipoprotein C-II              |
| Apoc3                                       | 40.02       | 40.56       | 0.02                                | 0.97107    | Apolipoprotein C-III             |
| Apoe                                        | 71.84       | 50.78       | -0.50                               | 0.46183    | Apolipoprotein E                 |
| ApoM                                        | 2.41        | 1.17        | -1.05                               | 0.13981    | Apolipoprotein M                 |
| Apob                                        | 0.96        | 2.63        | 1.45                                | 0.15808    | Apolipoprotein B                 |
| <b>Binding Proteins/Transporters</b>        |             |             |                                     |            |                                  |
| CETP PE                                     | 14.95       | 9.63        | -0.63                               | 0.42181    | Cholesteryl ester transfer prot. |
| Pltp                                        | 0.48        | 1.75        | 1.86                                | 0.12082    | Phospholipid transfer protein    |
| Rbp4                                        | 8.68        | 2.04        | -2.09                               | 0.05300    | Retinol-binding protein 4        |
| Cp                                          | 241.08      | 260.02      | 0.11                                | 0.45519    | Ceruloplasmin                    |
| Tf                                          | 647.54      | 658.65      | 0.02                                | 0.82721    | Serotransferrin                  |
| dpb                                         | 81.49       | 63.62       | -0.36                               | 0.06349    | vitamin D binding Protein        |
| <b>Enzymes</b>                              |             |             |                                     |            |                                  |
| Pon1                                        | 14.95       | 16.93       | 0.18                                | 0.66934    | Serum paraoxonase 1              |
| Pcyox1                                      | 0.96        | 1.46        | 0.60                                | 0.35517    | Prenylcysteine oxidase           |
| Serpina1e                                   | 239.63      | 272.27      | 0.18                                | 0.62779    | Alpha-1-antitrypsin 1-5          |
| F10                                         | 11.57       | 13.13       | 0.18                                | 0.56775    | Coagulation factor X             |
| <b>Acute Phase Response/Immune Response</b> |             |             |                                     |            |                                  |
| Saa4                                        | 6.27        | 7.00        | 0.16                                | 0.78890    | serum amyloid A-4 protein        |
| Saa2                                        | 9.64        | 13.42       | 0.48                                | 0.51514    | serum amyloid A-2 protein        |
| H2-Q10                                      | 24.11       | 36.48       | 0.60                                | 0.05164    | H-2 class I HC antigen           |
| C3                                          | 685.63      | 632.97      | -0.12                               | 0.57927    | Complement component 3           |
| Orm2                                        | 160.56      | 211.28      | 0.40                                | 0.36739    | Alpha-1-acid glycoprotein 2      |
| C5                                          | 160.56      | 211.28      | -0.30                               | 0.21089    | Complement component 5           |
| <b>Other HDL Proteins</b>                   |             |             |                                     |            |                                  |
| Vtn                                         | 22.18       | 18.97       | -0.23                               | 0.57196    | vitronectin                      |
| Kng1                                        | 155.26      | 108.27      | -0.52                               | 0.08393    | Kininogen                        |
| Serpinc1                                    | 141.76      | 197.57      | 0.48                                | 0.00727    | antithrombin III                 |
|                                             |             | white       | no change                           |            |                                  |
|                                             |             | light green | significantly increased in SHAM-HFD |            |                                  |
|                                             |             | light blue  | significantly decreased in SHAM-HFD |            |                                  |

**Supplemental Table 1:** Effect of HFD on HDL composition in SHAM mice.

| 1) Gene                                     | 2) OVX-LFD | 3) OVX-HFD  | 4) log( $\lambda_1\lambda_2$ )     | 5) p-value | 6) Description                   |
|---------------------------------------------|------------|-------------|------------------------------------|------------|----------------------------------|
| <b>Lipoprotein / Lipid Transport</b>        |            |             |                                    |            |                                  |
| Apoa1                                       | 269.83     | 335.48      | 0.31                               | 0.09464    | Apolipoprotein A-I               |
| Apoa2                                       | 31.10      | 144.37      | 2.21                               | 0.00046    | Apolipoprotein A-II              |
| Apoa4                                       | 87.87      | 136.11      | 0.63                               | 0.03284    | Apolipoprotein A-IV              |
| Apoc1                                       | 1.94       | 5.01        | 1.37                               | 0.28963    | Apolipoprotein C-I               |
| Apoc2                                       | 2.72       | 26.99       | 3.31                               | 0.00907    | Apolipoprotein C-II              |
| Apoc3                                       | 12.83      | 41.58       | 1.70                               | 0.00860    | Apolipoprotein C-III             |
| Apoe                                        | 42.77      | 53.38       | 0.32                               | 0.45907    | Apolipoprotein E                 |
| ApoM                                        | 1.17       | 2.36        | 1.02                               | 0.27345    | Apolipoprotein M                 |
| Apob                                        | 3.89       | 4.13        | 0.09                               | 0.89443    | Apolipoprotein B                 |
| <b>Binding Proteins/Transporters</b>        |            |             |                                    |            |                                  |
| CETP PE                                     | 8.16       | 13.71       | 0.75                               | 0.23775    | Cholesteryl ester transfer prot. |
| Rbp4                                        | 12.44      | 7.96        | -0.64                              | 0.35274    | Retinol-binding protein 4        |
| Cp                                          | 269.83     | 237.27      | -0.19                              | 0.21064    | Ceruloplasmin                    |
| Tf                                          | 731.34     | 571.42      | -0.36                              | 0.07013    | Serotransferrin                  |
| dpb                                         | 50.16      | 63.85       | 0.35                               | 0.19213    | vitamin D binding Protein        |
| <b>Enzymes</b>                              |            |             |                                    |            |                                  |
| Pon1                                        | 14.39      | 21.82       | 0.60                               | 0.05689    | Serum paraoxonase 1              |
| Serpina1e                                   | 161.35     | 284.31      | 0.82                               | 0.01466    | Alpha-1-antitrypsin 1-5          |
| F10                                         | 9.72       | 11.06       | 0.19                               | 0.52969    | Coagulation factor X             |
| Sod1                                        | 3.89       | 6.64        | 0.77                               | 0.15936    | Superoxide dismutase             |
| <b>Acute Phase Response/Immune Response</b> |            |             |                                    |            |                                  |
| Saa4                                        | 10.11      | 14.89       | 0.56                               | 0.06875    | serum amyloid A-4 protein        |
| Saa2                                        | 8.94       | 16.96       | 0.92                               | 0.25943    | serum amyloid A-2 protein        |
| H2-Q10                                      | 1.17       | 2.51        | 1.10                               | 0.31839    | H-2 class I HC antigen           |
| C3                                          | 595.65     | 694.41      | 0.22                               | 0.20073    | Complement component 3           |
| Orm2                                        | 131.03     | 194.06      | 0.57                               | 0.24231    | Alpha-1-acid glycoprotein 2      |
| C5                                          | 48.21      | 58.10       | 0.27                               | 0.24874    | Complement component 5           |
| <b>Other HDL Proteins</b>                   |            |             |                                    |            |                                  |
| Vtn                                         | 11.28      | 20.06       | 0.83                               | 0.00126    | vitronectin                      |
| Kng1                                        | 219.67     | 101.46      | -1.11                              | 0.00058    | Kininogen                        |
| Serpinc1                                    | 79.32      | 134.05      | 0.76                               | 0.02076    | antithrombin III                 |
|                                             |            | white       | no change                          |            |                                  |
|                                             |            | light green | significantly increased in OVX-HFD |            |                                  |
|                                             |            | light blue  | significantly decreased in OVX-HFD |            |                                  |

**Supplemental Table 2:** Effect of HFD on HDL composition in OVX mice.

| 1) Gene                                     | 2) Sham-LFD | 3) OVX-LFD  | 4) log( $\lambda_1/\lambda_2$ )    | 5) p-value | 6) Description                   |
|---------------------------------------------|-------------|-------------|------------------------------------|------------|----------------------------------|
| <b>Lipoprotein / Lipid Transport</b>        |             |             |                                    |            |                                  |
| Apoa1                                       | 298.94      | 269.83      | -0.15                              | 0.57122    | Apolipoprotein A-I               |
| Apoa2                                       | 67.02       | 31.10       | -1.11                              | 0.02883    | Apolipoprotein A-II              |
| Apoa4                                       | 116.68      | 87.87       | -0.41                              | 0.15440    | Apolipoprotein A-IV              |
| Apoc1                                       | 1.93        | 1.94        | 0.01                               | 0.99421    | Apolipoprotein C-I               |
| Apoc2                                       | 6.27        | 2.72        | -1.20                              | 0.42863    | Apolipoprotein C-II              |
| Apoc3                                       | 40.02       | 12.83       | -1.64                              | 0.13121    | Apolipoprotein C-III             |
| Apoe                                        | 71.84       | 42.77       | -0.75                              | 0.36490    | Apolipoprotein E                 |
| ApoM                                        | 2.41        | 1.17        | -1.05                              | 0.47014    | Apolipoprotein M                 |
| Apob                                        | 0.96        | 3.89        | 2.01                               | 0.13569    | Apolipoprotein B                 |
| <b>Binding Proteins/Transporters</b>        |             |             |                                    |            |                                  |
| CETP PE                                     | 14.95       | 8.16        | -0.87                              | 0.19878    | Cholesteryl ester transfer prot. |
| Rbp4                                        | 8.68        | 12.44       | 0.52                               | 0.51683    | Retinol-binding protein 4        |
| Cp                                          | 241.08      | 269.83      | 0.16                               | 0.32198    | Ceruloplasmin                    |
| Tf                                          | 647.54      | 731.34      | 0.18                               | 0.60625    | Serotransferrin                  |
| dpb                                         | 81.49       | 50.16       | -0.70                              | 0.08657    | vitamin D binding Protein        |
| <b>Enzymes</b>                              |             |             |                                    |            |                                  |
| Pon1                                        | 14.95       | 14.39       | -0.06                              | 0.92275    | Serum paraoxonase 1              |
| Serpina1e                                   | 239.63      | 161.35      | -0.57                              | 0.34242    | Alpha-1-antitrypsin 1-5          |
| F10                                         | 11.57       | 9.72        | -0.25                              | 0.25767    | Coagulation factor X             |
| Sod1                                        | 4.34        | 3.89        | -0.16                              | 0.77328    | Superoxide dismutase             |
| <b>Acute Phase Response/Immune Response</b> |             |             |                                    |            |                                  |
| Saa4                                        | 6.27        | 10.11       | 0.69                               | 0.19700    | serum amyloid A-4 protein        |
| Saa2                                        | 9.64        | 8.94        | -0.11                              | 0.84516    | serum amyloid A-2 protein        |
| H2-Q10                                      | 2.41        | 1.17        | -1.05                              | 0.38485    | H-2 class I HC antigen           |
| C3                                          | 685.63      | 595.65      | -0.20                              | 0.49863    | Complement component 3           |
| Orm2                                        | 160.56      | 131.03      | -0.29                              | 0.75467    | Alpha-1-acid glycoprotein 2      |
| C5                                          | 54.97       | 48.21       | -0.19                              | 0.55641    | Complement component 5           |
| <b>Other HDL Proteins</b>                   |             |             |                                    |            |                                  |
| Vtn                                         | 22.18       | 11.28       | -0.98                              | 0.00727    | vitronectin                      |
| Kng1                                        | 155.26      | 219.67      | 0.50                               | 0.25725    | Kininogen                        |
| Serpinc1                                    | 141.76      | 79.32       | -0.84                              | 0.05427    | antithrombin III                 |
|                                             |             | white       | no change                          |            |                                  |
|                                             |             | light green | significantly increased in OVX-LFD |            |                                  |
|                                             |             | light blue  | significantly decreased in OVX-LFD |            |                                  |

**Supplemental Table 3:** Effect of OVX on HDL composition in LFD-fed mice.

| 1) Gene                                     | 2) Sham-HFD | 3) OVX-HFD  | 4) log( $\lambda$ 1 $\lambda$ 2)   | 5) p-value | 6) Description                   |
|---------------------------------------------|-------------|-------------|------------------------------------|------------|----------------------------------|
| <b>Lipoprotein / Lipid Transport</b>        |             |             |                                    |            |                                  |
| Apoa1                                       | 269.36      | 335.48      | 0.32                               | 0.11366    | Apolipoprotein A-I               |
| Apoa2                                       | 66.83       | 144.37      | 1.11                               | 0.00575    | Apolipoprotein A-II              |
| Apoa4                                       | 147.08      | 136.11      | -0.11                              | 0.54012    | Apolipoprotein A-IV              |
| Apoc1                                       | 9.92        | 0.74        | 1.78                               | 0.12463    | Apolipoprotein C-I               |
| Apoc2                                       | 18.09       | 26.99       | 0.58                               | 0.26879    | Apolipoprotein C-II              |
| Apoc3                                       | 40.56       | 41.58       | 0.04                               | 0.90899    | Apolipoprotein C-III             |
| ApoE                                        | 50.78       | 53.38       | 0.07                               | 0.84527    | Apolipoprotein E                 |
| ApoM                                        | 1.17        | 2.36        | 1.02                               | 0.10402    | Apolipoprotein M                 |
| ApoB                                        | 2.63        | 4.13        | 0.65                               | 0.28864    | Apolipoprotein B                 |
| <b>Binding Proteins/Transporters</b>        |             |             |                                    |            |                                  |
| CETP PE                                     | 9.63        | 13.71       | 0.51                               | 0.39197    | Cholesteryl ester transfer prot. |
| Rbp4                                        | 2.04        | 7.96        | 1.96                               | 0.05342    | Retinol-binding protein 4        |
| Cp                                          | 260.02      | 237.27      | -0.13                              | 0.31110    | Ceruloplasmin                    |
| Tf                                          | 658.65      | 571.42      | -0.20                              | 0.03676    | Serotransferrin                  |
| dpb                                         | 63.62       | 63.85       | 0.01                               | 0.97581    | vitamin D binding Protein        |
| <b>Enzymes</b>                              |             |             |                                    |            |                                  |
| Pon1                                        | 16.93       | 21.82       | 0.37                               | 0.11478    | Serum paraoxonase 1              |
| Pcyox1                                      | 1.46        | 1.33        | -0.14                              | 0.88101    | Prenylcysteine oxidase           |
| Serpina1e                                   | 272.27      | 284.31      | 0.06                               | 0.74775    | Alpha-1-antitrypsin 1-5          |
| F10                                         | 13.13       | 11.06       | -0.25                              | 0.36516    | Coagulation factor X             |
| Sod1                                        | 4.96        | 6.64        | 0.42                               | 0.32289    | Superoxide dismutase             |
| <b>Acute Phase Response/Immune Response</b> |             |             |                                    |            |                                  |
| Saa4                                        | 7.00        | 14.89       | 1.09                               | 0.00459    | serum amyloid A-4 protein        |
| Saa2                                        | 13.42       | 16.96       | 0.34                               | 0.60895    | serum amyloid A-2 protein        |
| H2-Q10                                      | 0.29        | 2.51        | 3.10                               | 0.03760    | H-2 class I HC antigen           |
| C3                                          | 632.97      | 694.41      | 0.13                               | 0.30218    | Complement component 3           |
| Orm2                                        | 211.28      | 194.06      | -0.12                              | 0.60861    | Alpha-1-acid glycoprotein 2      |
| C5                                          | 44.65       | 58.10       | 0.38                               | 0.05786    | Complement component 5           |
| <b>Other</b>                                |             |             |                                    |            |                                  |
| Vtn                                         | 18.97       | 20.06       | 0.08                               | 0.73091    | vitronectin                      |
| Kng1                                        | 108.27      | 101.46      | -0.09                              | 0.59785    | Kininogen                        |
| Serpinc1                                    | 197.57      | 134.05      | -0.56                              | 0.00499    | antithrombin III                 |
|                                             |             | white       | no change                          |            |                                  |
|                                             |             | light green | significantly increased in OVX-HFD |            |                                  |
|                                             |             | light blue  | significantly decreased in OVX-HFD |            |                                  |

**Supplemental Table 4:** Effect of OVX on HDL composition in HFD-fed mice.

Supplemental Table 5: List of shared and unique proteins presented in the Venn Diagram, Figure 5 in main text

**Elements only in "SHAM-LFD":**

g|1258645100|ref|NP\_001158262.1|-secretogranin-3 isoform 2 precursor [Mus musculus]  
g|6677867|ref|NP\_033156.1|-secretogranin-3 isoform 1 precursor [Mus musculus]  
g|9910582|ref|NP\_064365.1|-testis-expressed protein 101 precursor [Mus musculus]

**Elements only in "SHAM-HFD":**

g|124248484|ref|NP\_035988.2|-teneurin-4 [Mus musculus]  
g|7242187|ref|NP\_035305.1|-legumain precursor [Mus musculus]  
g|12963569|ref|NP\_075689.1|-protein phosphatase 1 regulatory subunit 7 [Mus musculus]  
g|189458800|ref|NP\_032409.3|-centrosome-associated protein CEP250 isoform 1 [Mus musculus]  
g|189458802|ref|NP\_796191.2|-centrosome-associated protein CEP250 isoform 1 [Mus musculus]  
g|194018503|ref|NP\_001123472.1|-centrosome-associated protein CEP250 isoform 3 [Mus musculus]  
g|194097345|ref|NP\_001123471.1|-centrosome-associated protein CEP250 isoform 2 [Mus musculus]  
g|254039627|ref|NP\_001156800.1|-RNA-binding Raly-like protein isoform a [Mus musculus]  
g|254039629|ref|NP\_001156801.1|-RNA-binding Raly-like protein isoform b [Mus musculus]  
g|283436085|ref|NP\_851289.2|-coiled-coil domain-containing protein 79 [Mus musculus]  
g|30519977|ref|NP\_848746.1|-RNA-binding Raly-like protein isoform a [Mus musculus]  
g|52138546|ref|NP\_001004366.1|-signal peptide, CUB and EGF-like domain-containing protein 3 precursor [Mus musculus]  
g|6679509|ref|NP\_032979.1|-Psp [Mus musculus]

**Common elements in "OVX-LFD" and "HFD-OVX":**

g|158853992|ref|NP\_075608.2|-alpha-enolase [Mus musculus]  
g|309265176|ref|XP\_003086460.1|-PREDICTED: alpha-enolase-like isoform 7 [Mus musculus]  
g|309265178|ref|XP\_003086461.1|-PREDICTED: alpha-enolase-like isoform 8 [Mus musculus]  
g|309265180|ref|XP\_003086459.1|-PREDICTED: alpha-enolase-like isoform 6 [Mus musculus]  
g|309265182|ref|XP\_003086454.1|-PREDICTED: alpha-enolase-like isoform 1 [Mus musculus]  
g|309265184|ref|XP\_003086455.1|-PREDICTED: alpha-enolase-like isoform 2 [Mus musculus]  
g|309265186|ref|XP\_003086458.1|-PREDICTED: alpha-enolase-like isoform 5 [Mus musculus]  
g|309265188|ref|XP\_003086457.1|-PREDICTED: alpha-enolase-like isoform 4 [Mus musculus]  
g|309265757|ref|XP\_003086596.1|-PREDICTED: alpha-enolase-like [Mus musculus]  
g|70794816|ref|NP\_001020559.1|-hypothetical protein LOC433182 [Mus musculus]  
g|209862931|ref|NP\_001129534.1|-beta-enolase isoform 2 [Mus musculus]  
g|6679651|ref|NP\_031959.1|-beta-enolase isoform 1 [Mus musculus]  
g|257743039|ref|NP\_001129541.2|-L-lactate dehydrogenase A chain isoform 2 [Mus musculus]  
g|6754524|ref|NP\_034829.1|-L-lactate dehydrogenase A chain isoform 1 [Mus musculus]  
g|226958349|ref|NP\_033441.2|-triosephosphate isomerase [Mus musculus]  
g|7305395|ref|NP\_038660.1|-purine nucleoside phosphorylase [Mus musculus]  
g|21450291|ref|NP\_659152.1|-fructose-bisphosphate aldolase B [Mus musculus]  
g|237757318|ref|NP\_001025148.3|-complement factor H-related protein C isoform 1 [Mus musculus]  
g|237757322|ref|NP\_001153775.1|-complement factor H-related protein C isoform 2 [Mus musculus]  
g|83921618|ref|NP\_033536.2|-ezrin [Mus musculus]  
g|226874906|ref|NP\_033562.3|-14-3-3 protein epsilon [Mus musculus]  
g|153792131|ref|NP\_038659.2|-pyruvate kinase isozymes R/L isoform 1 [Mus musculus]  
g|153792772|ref|NP\_001093249.1|-pyruvate kinase isozymes R/L isoform 2 [Mus musculus]  
g|7106439|ref|NP\_035785.1|-tubulin beta-5 chain [Mus musculus]  
g|40556608|ref|NP\_032328.2|-heat shock protein HSP 90-beta [Mus musculus]  
g|33859482|ref|NP\_031933.1|-elongation factor 2 [Mus musculus]  
g|6680836|ref|NP\_031617.1|-calreticulin precursor [Mus musculus]  
g|268836255|ref|NP\_573461.2|-glycogen phosphorylase, liver form [Mus musculus]  
g|9910486|ref|NP\_064316.1|-platelet factor 4 precursor [Mus musculus]  
g|31982260|ref|NP\_032368.2|-insulin-like growth factor-binding protein 2 precursor [Mus musculus]  
g|6677837|ref|NP\_033140.1|-protein S100-A9 [Mus musculus]  
g|109638747|ref|NP\_001035916.1|-alpha-synuclein [Mus musculus]  
g|6678047|ref|NP\_033247.1|-alpha-synuclein [Mus musculus]  
g|110625656|ref|NP\_035180.2|-programmed cell death protein 4 [Mus musculus]  
g|270309159|ref|NP\_001161963.1|-programmed cell death protein 4 [Mus musculus]  
g|270309161|ref|NP\_001161964.1|-programmed cell death protein 4 [Mus musculus]  
g|240120112|ref|NP\_034306.2|-fumarylacetoacetate [Mus musculus]  
g|112293266|ref|NP\_032326.3|-heat shock 70 kDa protein 4 [Mus musculus]  
g|13386054|ref|NP\_080828.1|-actin-related protein 2/3 complex subunit 4 isoform 1 [Mus musculus]  
g|170172562|ref|NP\_032897.2|-plasminogen activator inhibitor 1 precursor [Mus musculus]  
g|162139827|ref|NP\_032641.2|-NADP-dependent malic enzyme isoform 1 [Mus musculus]  
g|262263372|ref|NP\_057870.3|-adenosylhomocysteinase [Mus musculus]  
g|45597447|ref|NP\_035564.1|-superoxide dismutase [Cu-Zn] [Mus musculus]

**Elements only in "OVX-LFD":**

g|6671762|ref|NP\_031736.1|-creatine kinase M-type [Mus musculus]  
g|147679082|ref|NP\_067447.2|-ribonuclease 4 precursor [Mus musculus]  
g|147679097|ref|NP\_957691.1|-ribonuclease 4 precursor [Mus musculus]  
g|70778976|ref|NP\_032854.2|-phosphoglycerate kinase 1 [Mus musculus]  
g|6680832|ref|NP\_031615.1|-calmodulin [Mus musculus]  
g|6680834|ref|NP\_031616.1|-calmodulin [Mus musculus]  
g|6753244|ref|NP\_033920.1|-calmodulin [Mus musculus]  
g|6754976|ref|NP\_035164.1|-peroxiredoxin-1 [Mus musculus]  
g|1227330633|ref|NP\_082408.3|-phosphoglucomutase-1 [Mus musculus]  
g|164519050|ref|NP\_032720.2|-neutrophilic granule protein [Mus musculus]  
g|31982030|ref|NP\_598557.3|-rho GDP-dissociation inhibitor 1 [Mus musculus]  
g|160298209|ref|NP\_034454.2|-aspartate aminotransferase, cytoplasmic [Mus musculus]  
g|6678674|ref|NP\_032518.1|-L-lactate dehydrogenase B chain [Mus musculus]  
g|10946574|ref|NP\_067248.1|-creatine kinase B-type [Mus musculus]  
g|255759941|ref|NP\_001157589.1|-serpin B6 isoform a [Mus musculus]

**Elements only in "HFD-OVX":**

g|149273202|ref|XP\_001476757.1|-PREDICTED: glyceraldehyde-3-phosphate dehydrogenase-like isoform 2 [Mus musculus]  
g|6679937|ref|NP\_032110.1|-glyceraldehyde-3-phosphate dehydrogenase [Mus musculus]  
g|172534792|ref|NP\_084127.2|-cytoplasmic dynein 2 heavy chain 1 [Mus musculus]  
g|144953885|ref|NP\_757342.2|-suprabasin isoform 1 [Mus musculus]  
g|13386452|ref|NP\_084358.1|-histone H2B type 3-A [Mus musculus]  
g|160420308|ref|NP\_835509.2|-histone H2B type 1-P [Mus musculus]  
g|160420310|ref|NP\_001091448.2|-H2b histone family, member A [Mus musculus]  
g|160420312|ref|NP\_001104025.1|-predicted gene 11277 [Mus musculus]  
g|28316760|ref|NP\_783595.1|-histone H2B type 1-B [Mus musculus]  
g|294997245|ref|NP\_001171124.1|-histone H2B type 1-C/E/G [Mus musculus]  
g|30061377|ref|NP\_835503.1|-histone H2B type 1-C/E/G [Mus musculus]  
g|30061381|ref|NP\_835505.1|-histone H2B type 1-F/J/L [Mus musculus]  
g|30061383|ref|NP\_835502.1|-histone H2B type 1-F/J/L [Mus musculus]  
g|30061385|ref|NP\_835507.1|-histone H2B type 1-M [Mus musculus]  
g|30061387|ref|NP\_835504.1|-histone H2B type 1-H [Mus musculus]  
g|30061389|ref|NP\_835506.1|-histone H2B type 1-F/J/L [Mus musculus]  
g|30061395|ref|NP\_835508.1|-histone H2B type 1-F/J/L [Mus musculus]  
g|30089704|ref|NP\_783596.1|-histone H2B type 1-K [Mus musculus]  
g|30089706|ref|NP\_835501.1|-histone H2B type 1-C/E/G [Mus musculus]  
g|146049029|ref|NP\_996765.1|-histone H2B type 3-B [Mus musculus]  
g|68131547|ref|NP\_075911.2|-histone H2B type 1-C/E/G [Mus musculus]  
g|68226431|ref|NP\_835586.2|-histone H2B type 2-E [Mus musculus]

g| 68226433|ref|NP\_783597.2|-histone H2B type 2-B [Mus musculus]  
g| 7305247|ref|NP\_038618.1|-lysozyme C-1 precursor [Mus musculus]  
g| 6679813|ref|NP\_032055.1|-vascular endothelial growth factor receptor 3 precursor [Mus musculus]  
g| 6671501|ref|NP\_031411.1|-apolipoprotein C-IV precursor [Mus musculus]  
g| 114520600|ref|NP\_034414.2|-growth hormone receptor isoform 1 precursor [Mus musculus]  
g| 124286805|ref|NP\_031598.2|-complement C1q subcomponent subunit A precursor [Mus musculus]  
g| 23956222|ref|NP\_076224.1|-actin-related protein 3 [Mus musculus]  
g| 11230802|ref|NP\_068695.1|-alpha-actinin-4 [Mus musculus]  
g| 225543434|ref|NP\_766267.2|-fragile site-associated protein [Mus musculus]  
g| 31982755|ref|NP\_035831.2|-vimentin [Mus musculus]  
g| 7305453|ref|NP\_038678.1|-protein S100-A8 [Mus musculus]  
g| 160333381|ref|NP\_032637.3|-neutrophil collagenase precursor [Mus musculus]  
g| 176866245|ref|NP\_291030.2|-sodium-driven chloride bicarbonate exchanger [Mus musculus]  
g| 22128627|ref|NP\_666238.1|-sorbitol dehydrogenase [Mus musculus]  
g| 13195690|ref|NP\_077239.1|-ubiquitin-40S ribosomal protein S27a [Mus musculus]  
g| 15082218|ref|NP\_083545.1|-secreted phosphoprotein 24 precursor [Mus musculus]  
g| 157671923|ref|NP\_062613.3|-polyubiquitin-C [Mus musculus]  
g| 158937312|ref|NP\_038588.2|-heat shock protein beta-1 [Mus musculus]  
g| 172072643|ref|NP\_057887.2|-reversion-inducing cysteine-rich protein with Kazal motifs precursor [Mus musculus]  
g| 291327510|ref|NP\_083177.2|-myosin XVIIIb [Mus musculus]  
g| 6755919|ref|NP\_035794.1|-polyubiquitin-B [Mus musculus]  
g| 76443694|ref|NP\_001029037.1|-ubiquitin-40S ribosomal protein S27a [Mus musculus]  
g| 9845265|ref|NP\_063936.1|-ubiquitin-60S ribosomal protein L40 [Mus musculus]  
g| 226958505|ref|NP\_808257.2|-serine/threonine-protein kinase ULK4 [Mus musculus]  
g| 7106355|ref|NP\_032613.1|-tyrosine-protein kinase Mer precursor [Mus musculus]  
g| 6680840|ref|NP\_031620.1|-calumenin isoform 1 [Mus musculus]  
g| 124517663|ref|NP\_034860.2|-annexin A1 [Mus musculus]  
g| 71896653|ref|NP\_082534.2|-zinc finger protein DZIP1L [Mus musculus]

**Common elements in "SHAM-HFD" and "OVX-LFD":**

g| 84042523|ref|NP\_001033581.1|-lysosomal protective protein isoform b [Mus musculus]  
g| 84042525|ref|NP\_032932.2|-lysosomal protective protein isoform a [Mus musculus]  
g| 126723006|ref|NP\_032535.2|-lipoprotein lipase precursor [Mus musculus]  
g| 226423933|ref|NP\_034060.2|-collagen alpha-1(III) chain precursor [Mus musculus]  
g| 209862989|ref|NP\_001129557.1|-ubiquitin-like modifier-activating enzyme 1 isoform 2 [Mus musculus]  
g| 34328049|ref|NP\_032517.1|-neutrophil gelatinase-associated lipocalin precursor [Mus musculus]  
g| 6678483|ref|NP\_033483.1|-ubiquitin-like modifier-activating enzyme 1 isoform 1 [Mus musculus]  
g| 19526986|ref|NP\_598529.1|-argininosuccinate lyase [Mus musculus]  
g| 225735645|ref|NP\_035309.3|-sulfated glycoprotein 1 isoform B preproprotein [Mus musculus]  
g| 225735649|ref|NP\_001139592.1|-sulfated glycoprotein 1 isoform A preproprotein [Mus musculus]  
g| 225735651|ref|NP\_001139593.1|-sulfated glycoprotein 1 isoform C preproprotein [Mus musculus]  
g| 225735653|ref|NP\_001139594.1|-sulfated glycoprotein 1 isoform D preproprotein [Mus musculus]  
g| 225735655|ref|NP\_001139595.1|-sulfated glycoprotein 1 isoform E preproprotein [Mus musculus]  
g| 84871986|ref|NP\_032186.2|-glutathione peroxidase 1 [Mus musculus]  
g| 153791547|ref|NP\_035206.2|-multidrug resistance protein 3 [Mus musculus]  
g| 254281348|ref|NP\_034022.2|-chitinase-3-like protein 3 precursor [Mus musculus]  
g| 254540027|ref|NP\_032644.3|-malate dehydrogenase, cytoplasmic [Mus musculus]

**Common elements in "OVX-LFD" and "HFD-OVX":**

g| 158853992|ref|NP\_075608.2|-alpha-enolase [Mus musculus]  
g| 309265176|ref|XP\_003086460.1|-PREDICTED: alpha-enolase-like isoform 7 [Mus musculus]  
g| 309265178|ref|XP\_003086461.1|-PREDICTED: alpha-enolase-like isoform 8 [Mus musculus]  
g| 309265180|ref|XP\_003086459.1|-PREDICTED: alpha-enolase-like isoform 6 [Mus musculus]  
g| 309265182|ref|XP\_003086454.1|-PREDICTED: alpha-enolase-like isoform 1 [Mus musculus]  
g| 309265184|ref|XP\_003086455.1|-PREDICTED: alpha-enolase-like isoform 2 [Mus musculus]  
g| 309265186|ref|XP\_003086458.1|-PREDICTED: alpha-enolase-like isoform 5 [Mus musculus]  
g| 309265188|ref|XP\_003086457.1|-PREDICTED: alpha-enolase-like isoform 4 [Mus musculus]  
g| 309265757|ref|XP\_003086596.1|-PREDICTED: alpha-enolase-like [Mus musculus]  
g| 70794816|ref|NP\_001020559.1|-hypothetical protein LOC433182 [Mus musculus]  
g| 209862931|ref|NP\_001129534.1|-beta-enolase isoform 2 [Mus musculus]  
g| 6679651|ref|NP\_031959.1|-beta-enolase isoform 1 [Mus musculus]  
g| 257743039|ref|NP\_001129541.2|-L-lactate dehydrogenase A chain isoform 2 [Mus musculus]  
g| 6754524|ref|NP\_034829.1|-L-lactate dehydrogenase A chain isoform 1 [Mus musculus]  
g| 226958349|ref|NP\_033441.2|-triosephosphate isomerase [Mus musculus]  
g| 7305395|ref|NP\_038660.1|-purine nucleoside phosphorylase [Mus musculus]  
g| 21450291|ref|NP\_659152.1|-fructose-bisphosphate aldolase B [Mus musculus]  
g| 237757318|ref|NP\_001025148.3|-complement factor H-related protein C isoform 1 [Mus musculus]  
g| 237757322|ref|NP\_001153775.1|-complement factor H-related protein C isoform 2 [Mus musculus]  
g| 83921618|ref|NP\_033536.2|-ezrin [Mus musculus]  
g| 226874906|ref|NP\_033562.3|-14-3-3 protein epsilon [Mus musculus]  
g| 153792131|ref|NP\_038659.2|-pyruvate kinase isozymes R/L isoform 1 [Mus musculus]  
g| 153792772|ref|NP\_001093249.1|-pyruvate kinase isozymes R/L isoform 2 [Mus musculus]  
g| 7106439|ref|NP\_035785.1|-tubulin beta-5 chain [Mus musculus]  
g| 40556608|ref|NP\_032328.2|-heat shock protein HSP 90-beta [Mus musculus]  
g| 33859482|ref|NP\_031933.1|-elongation factor 2 [Mus musculus]  
g| 6680836|ref|NP\_031617.1|-calreticulin precursor [Mus musculus]  
g| 268836255|ref|NP\_573461.2|-glycogen phosphorylase, liver form [Mus musculus]  
g| 9910486|ref|NP\_064316.1|-platelet factor 4 precursor [Mus musculus]  
g| 31982260|ref|NP\_032368.2|-insulin-like growth factor-binding protein 2 precursor [Mus musculus]  
g| 6677837|ref|NP\_033140.1|-protein S100-A9 [Mus musculus]  
g| 109638747|ref|NP\_001035916.1|-alpha-synuclein [Mus musculus]  
g| 6678047|ref|NP\_033247.1|-alpha-synuclein [Mus musculus]  
g| 110625656|ref|NP\_035180.2|-programmed cell death protein 4 [Mus musculus]  
g| 270309159|ref|NP\_001161963.1|-programmed cell death protein 4 [Mus musculus]  
g| 270309161|ref|NP\_001161964.1|-programmed cell death protein 4 [Mus musculus]  
g| 240120112|ref|NP\_034306.2|-fumarylacetoacetase [Mus musculus]  
g| 112293266|ref|NP\_032326.3|-heat shock 70 kDa protein 4 [Mus musculus]  
g| 13386054|ref|NP\_080828.1|-actin-related protein 2/3 complex subunit 4 isoform 1 [Mus musculus]  
g| 170172562|ref|NP\_032897.2|-plasminogen activator inhibitor 1 precursor [Mus musculus]  
g| 162139827|ref|NP\_032641.2|-NADP-dependent malic enzyme isoform 1 [Mus musculus]  
g| 262263372|ref|NP\_057870.3|-adenosylhomocysteinase [Mus musculus]  
g| 45597447|ref|NP\_035564.1|-superoxide dismutase [Cu-Zn] [Mus musculus]

**Common elements in "SHAM-HFD", "OVX-LFD" and "HFD-OVX":**

g| 6753332|ref|NP\_033971.1|-monocyte differentiation antigen CD14 precursor [Mus musculus]  
g| 255708471|ref|NP\_001157531.1|-L-selectin isoform 2 [Mus musculus]  
g| 6755454|ref|NP\_035476.1|-L-selectin isoform 1 [Mus musculus]  
g| 6753824|ref|NP\_035942.1|-fibulin-5 precursor [Mus musculus]  
g| 225007619|ref|NP\_853627.2|-resistin-like gamma [Mus musculus]  
g| 31543976|ref|NP\_061359.2|-14-3-3 protein gamma [Mus musculus]  
g| 33468855|ref|NP\_032160.1|-glycosylation-dependent cell adhesion molecule 1 precursor [Mus musculus]  
g| 160707996|ref|NP\_067256.2|-cathepsin 5 preproprotein [Mus musculus]  
g| 21389311|ref|NP\_034623.1|-intercellular adhesion molecule 1 precursor [Mus musculus]  
g| 149270456|ref|XP\_001478454.1|-PREDICTED: cytochrome c, somatic-like isoform 2 [Mus musculus]  
g| 170295823|ref|NP\_035823.3|-vascular cell adhesion protein 1 precursor [Mus musculus]  
g| 309267105|ref|XP\_003086954.1|-PREDICTED: cytochrome c, somatic-like [Mus musculus]  
g| 6681095|ref|NP\_031834.1|-cytochrome c, somatic [Mus musculus]

g|111120329|ref|NP\_031769.2|-collagen alpha-2(I) chain precursor [Mus musculus]  
g|157951741|ref|NP\_033934.2|-catalase [Mus musculus]  
g|148747558|ref|NP\_035693.3|-peroxiredoxin-2 [Mus musculus]  
g|309265328|ref|XP\_979506.2|-PREDICTED: alpha-fetoprotein, partial [Mus musculus]  
g|309272159|ref|XP\_891828.4|-PREDICTED: alpha-fetoprotein, partial [Mus musculus]  
g|166235886|ref|NP\_031825.2|-cathepsin E preproprotein [Mus musculus]  
g|34328108|ref|NP\_031768.2|-collagen alpha-1(I) chain precursor [Mus musculus]  
g|6679731|ref|NP\_032002.1|-coagulation factor V precursor [Mus musculus]  
g|33859640|ref|NP\_035658.1|-transaldolase [Mus musculus]  
g|70778915|ref|NP\_034963.2|-moesin [Mus musculus]

**Common elements in "SHAM-LFD", "SHAM-HFD", "OVX-LFD" and "HFD-OVX":**

g|163310765|ref|NP\_033784.2|-serum albumin precursor [Mus musculus]  
g|148747546|ref|NP\_035588.2|-serine protease inhibitor A3K precursor [Mus musculus]  
g|126518317|ref|NP\_033908.2|-complement C3 [Mus musculus]  
g|20330802|ref|NP\_598738.1|-serotransferrin precursor [Mus musculus]  
g|309266718|ref|XP\_003086840.1|-PREDICTED: complement C3-like, partial [Mus musculus]  
g|76881807|ref|NP\_033270.3|-alpha-1-antitrypsin 1-2 precursor [Mus musculus]  
g|6678085|ref|NP\_033272.1|-alpha-1-antitrypsin 1-4 precursor [Mus musculus]  
g|6678083|ref|NP\_033271.1|-alpha-1-antitrypsin 1-3 [Mus musculus]  
g|6678079|ref|NP\_033269.1|-alpha-1-antitrypsin 1-1 precursor [Mus musculus]  
g|309267120|ref|XP\_003086957.1|-PREDICTED: serine protease inhibitor A3K-like [Mus musculus]  
g|160333004|ref|NP\_033822.2|-apolipoprotein A-I preproprotein [Mus musculus]  
g|160358829|ref|NP\_059067.2|-hemopexin precursor [Mus musculus]  
g|31982171|ref|NP\_032671.2|-muringlobulin-1 precursor [Mus musculus]  
g|160333710|ref|NP\_033279.2|-serine protease inhibitor A3M precursor [Mus musculus]  
g|110347564|ref|NP\_031778.2|-ceruloplasmin isoform b [Mus musculus]  
g|6678087|ref|NP\_033273.1|-alpha-1-antitrypsin 1-5 precursor [Mus musculus]  
g|28916693|ref|NP\_666232.2|-gelsolin precursor [Mus musculus]  
g|226531069|ref|NP\_001152771.1|-inter-alpha-trypsin inhibitor, heavy chain 4 isoform 2 [Mus musculus]  
g|6679182|ref|NP\_032794.1|-alpha-1-acid glycoprotein 1 precursor [Mus musculus]  
g|6754950|ref|NP\_035146.1|-alpha-1-acid glycoprotein 2 precursor [Mus musculus]  
g|156231021|ref|NP\_001095881.1|-kininogen-1 isoform 1 [Mus musculus]  
g|257471003|ref|NP\_032903.3|-plasminogen [Mus musculus]  
g|130503031|ref|NP\_033278.2|-serine protease inhibitor A3N precursor [Mus musculus]  
g|18252782|ref|NP\_543120.1|-antithrombin-III precursor [Mus musculus]  
g|62548316|ref|NP\_038651.2|-alpha-1-acid glycoprotein 3 precursor [Mus musculus]  
g|7304875|ref|NP\_038493.1|-alpha-2-HS-glycoprotein precursor [Mus musculus]  
g|157951698|ref|NP\_033910.2|-complement C4-B precursor [Mus musculus]  
g|110347473|ref|NP\_031494.2|-apolipoprotein A-IV precursor [Mus musculus]  
g|218156289|ref|NP\_032224.2|-complement factor B isoform 1 [Mus musculus]  
g|309265692|ref|XP\_922625.4|-PREDICTED: muringlobulin-1-like [Mus musculus]  
g|309268554|ref|XP\_001480324.2|-PREDICTED: muringlobulin-1-like [Mus musculus]  
g|159110717|ref|NP\_032433.2|-inter-alpha-trypsin inhibitor heavy chain H3 precursor [Mus musculus]  
g|21313642|ref|NP\_082194.1|-inhibitor of carbonic anhydrase [Mus musculus]  
g|51172612|ref|NP\_032122.1|-vitamin D-binding protein precursor [Mus musculus]  
g|247269929|ref|NP\_031980.2|-liver carboxylesterase N precursor [Mus musculus]  
g|153945747|ref|NP\_032672.2|-muringlobulin-2 precursor [Mus musculus]  
g|6679383|ref|NP\_032904.1|-alpha-2-antiplasmin precursor [Mus musculus]  
g|163644329|ref|NP\_033826.2|-apolipoprotein E precursor [Mus musculus]  
g|7305599|ref|NP\_038725.1|-transthyretin [Mus musculus]  
g|157951676|ref|NP\_038502.2|-apolipoprotein A-II precursor [Mus musculus]  
g|160358825|ref|NP\_038503.4|-beta-2-glycoprotein 1 precursor [Mus musculus]  
g|110347406|ref|NP\_031712.2|-complement factor I precursor [Mus musculus]  
Cnrm\_Q652C0|Q652C0\_MOUSE-Kappa light chain C\_region (Fragment) - Mus musculus (Mouse).  
g|6754164|ref|NP\_034536.1|-complement C5 preproprotein [Mus musculus]  
g|126215532|ref|NP\_035543.2|-sex-limited protein [Mus musculus]  
g|124487013|ref|NP\_001074841.1|-carboxylesterase 1B [Mus musculus]  
g|6753798|ref|NP\_034298.1|-prothrombin [Mus musculus]  
g|214010170|ref|NP\_038520.2|-clusterin precursor [Mus musculus]  
g|226958456|ref|NP\_444406.2|-histidine-rich glycoprotein [Mus musculus]  
g|10947006|ref|NP\_067539.1|-fetuin-B isoform 1 [Mus musculus]  
g|144226227|ref|NP\_001077374.1|-fetuin-B isoform 3 [Mus musculus]  
g|15421856|ref|NP\_075603.1|-apolipoprotein C-III precursor [Mus musculus]  
g|22122667|ref|NP\_666260.1|-complement component C8 alpha chain precursor [Mus musculus]  
g|46560582|ref|NP\_997538.1|-epidermal growth factor receptor isoform 1 [Mus musculus]  
g|68131562|ref|NP\_001020116.1|-sulfhydryl oxidase 1 isoform a [Mus musculus]  
g|12963609|ref|NP\_075757.1|-sulfhydryl oxidase 1 isoform b [Mus musculus]  
g|6680856|ref|NP\_031644.1|-corticosteroid-binding globulin precursor [Mus musculus]  
g|309268896|ref|XP\_003084761.1|-PREDICTED: hemoglobin subunit beta-1-like isoform 1 [Mus musculus]  
g|309268898|ref|XP\_003084763.1|-PREDICTED: hemoglobin subunit beta-1-like isoform 3 [Mus musculus]  
g|309268900|ref|XP\_003084764.1|-PREDICTED: hemoglobin subunit beta-1-like isoform 4 [Mus musculus]  
g|309268902|ref|XP\_003084762.1|-PREDICTED: hemoglobin subunit beta-1-like isoform 2 [Mus musculus]  
g|31982300|ref|NP\_032246.2|-hemoglobin subunit beta-1 [Mus musculus]  
g|156231029|ref|NP\_001095879.1|-kininogen 2 isoform 2 [Mus musculus]  
g|163914390|ref|NP\_033906.2|-plasma protease C1 inhibitor precursor [Mus musculus]  
g|226874935|ref|NP\_034712.2|-inter-alpha-trypsin inhibitor heavy chain H2 [Mus musculus]  
g|7304867|ref|NP\_038487.1|-complement factor D precursor [Mus musculus]  
g|125347464|ref|NP\_660128.2|-afamin precursor [Mus musculus]  
g|124486702|ref|NP\_001074536.1|-alpha-1B-glycoprotein precursor [Mus musculus]  
Cnrm\_P01868|IGHG1\_MOUSE-Ig gamma-1 chain C region secreted form - Mus musculus (Mouse).  
g|15375312|ref|NP\_038513.1|-complement component C9 [Mus musculus]  
Cnrm\_P03987|GC3M\_MOUSE-Ig gamma-3 chain C region, membrane-bound form - Mus musculus (Mouse).  
Cnrm\_P22436|GC3\_MOUSE-Ig gamma-3 chain C region, secreted form - Mus musculus (Mouse).  
g|6754132|ref|NP\_034521.1|-H-2 class I histocompatibility antigen, Q10 alpha chain precursor [Mus musculus]  
g|269973844|ref|NP\_001161767.1|-serine protease inhibitor A3F [Mus musculus]  
g|269973937|ref|NP\_001028507.2|-serine protease inhibitor A3F [Mus musculus]  
g|269973939|ref|NP\_001161766.1|-serine protease inhibitor A3F [Mus musculus]  
g|6671509|ref|NP\_031419.1|-actin, cytoplasmic 1 [Mus musculus]  
g|6752954|ref|NP\_033739.1|-actin, cytoplasmic 2 [Mus musculus]  
g|124249351|ref|NP\_032432.2|-inter-alpha-trypsin inhibitor heavy chain H1 precursor [Mus musculus]  
g|33563297|ref|NP\_598643.1|-complement component C8 beta chain precursor [Mus musculus]  
g|16418335|ref|NP\_084072.1|-leucine-rich alpha-2-glycoprotein [Mus musculus]  
g|148277054|ref|NP\_659187.2|-complement C1s-A subcomponent [Mus musculus]  
g|148277056|ref|NP\_001091086.1|-complement C1s-A subcomponent [Mus musculus]  
g|6755987|ref|NP\_035837.1|-vitronectin precursor [Mus musculus]  
g|236465805|ref|NP\_032481.2|-plasma kallikrein precursor [Mus musculus]  
g|226958497|ref|NP\_035448.2|-serum amyloid P-component precursor [Mus musculus]  
g|110735408|ref|NP\_001036078.1|-selenoprotein P precursor [Mus musculus]  
g|110735411|ref|NP\_001036079.1|-selenoprotein P precursor [Mus musculus]  
g|74271806|ref|NP\_033181.3|-selenoprotein P precursor [Mus musculus]  
g|7305235|ref|NP\_038612.1|-leukemia inhibitory factor receptor isoform 1 precursor [Mus musculus]  
g|113195684|ref|NP\_034799.2|-keratin, type II cytoskeletal 6B [Mus musculus]  
g|157951596|ref|NP\_033931.4|-carbonic anhydrase 2 [Mus musculus]  
g|111378397|ref|NP\_032182.2|-phosphatidylinositol-glycan-specific phospholipase D [Mus musculus]  
g|161377465|ref|NP\_032249.3|-heparin cofactor 2 precursor [Mus musculus]  
g|6681079|ref|NP\_031824.1|-cathepsin B preproprotein [Mus musculus]



g|109627652|ref|NP\_034018.2|-complement factor H [Mus musculus]  
g|145301549|ref|NP\_001077424.1|-hemoglobin alpha, adult chain 2 [Mus musculus]  
g|145301578|ref|NP\_032244.2|-hemoglobin subunit alpha [Mus musculus]  
g|113461998|ref|NP\_031454.3|-angiotensinogen [Mus musculus]  
g|31981720|ref|NP\_659083.2|-protein Z-dependent protease inhibitor precursor [Mus musculus]  
g|31560677|ref|NP\_032548.2|-lactoferrin precursor [Mus musculus]  
g|261823995|ref|NP\_035264.2|-serum paraoxonase/arylesterase 1 [Mus musculus]  
sp|P47896|CETP\_MACFA-Cholesteryl ester transfer protein OS=Macaca fascicularis GN=CETP PE=2 SV=1  
g|162138926|ref|NP\_031794.3|-C-reactive protein precursor [Mus musculus]  
g|117606335|ref|NP\_035470.3|-pigment epithelium-derived factor precursor [Mus musculus]  
g|29789317|ref|NP\_579935.1|-keratin, type II cytoskeletal 75 [Mus musculus]  
g|114145561|ref|NP\_112447.2|-keratin, type II cytoskeletal 8 [Mus musculus]  
g|157951694|ref|NP\_038512.2|-complement C2 precursor [Mus musculus]  
Cntm\_P01866|GCB\_MOUSE-Ig gamma-2B chain C region secreted form - Mus musculus (Mouse).  
Cntm\_P01867|GCB\_MOUSE-Ig gamma-2B chain C region, membrane-bound form - Mus musculus (Mouse).  
Cntm\_P01864|GCB\_MOUSE-Ig gamma-2A chain C region secreted form - Mus musculus (Mouse).  
g|110625994|ref|NP\_031998.3|-coagulation factor X precursor [Mus musculus]  
g|6677843|ref|NP\_033143.1|-serum amyloid A-1 protein precursor [Mus musculus]  
g|33563240|ref|NP\_033736.1|-actin, alpha skeletal muscle [Mus musculus]  
g|31982712|ref|NP\_062749.2|-carboxypeptidase B2 precursor [Mus musculus]  
g|112983636|ref|NP\_034790.2|-keratin, type I cytoskeletal 10 [Mus musculus]  
g|167555029|ref|NP\_001104518.1|-fibrinogen, alpha polypeptide isoform 1 [Mus musculus]  
g|33563252|ref|NP\_034326.1|-fibrinogen, alpha polypeptide isoform 2 [Mus musculus]  
g|160415217|ref|NP\_038506.2|-zinc-alpha-2-glycoprotein precursor [Mus musculus]  
g|6755394|ref|NP\_035444.1|-serum amyloid A-2 protein precursor [Mus musculus]  
g|110347469|ref|NP\_031402.3|-alpha-2-macroglobulin precursor [Mus musculus]  
g|14527179|ref|NP\_001077398.1|-glutathione peroxidase 3 isoform 1 [Mus musculus]  
g|15011841|ref|NP\_032187.2|-glutathione peroxidase 3 isoform 2 [Mus musculus]  
g|126116585|ref|NP\_032499.2|-keratin, type II cytoskeletal 1 [Mus musculus]  
g|16033372|ref|NP\_032550.2|-lumican precursor [Mus musculus]  
g|226958688|ref|NP\_001152959.1|-retinol-binding protein 4 isoform 1 [Mus musculus]  
g|33859612|ref|NP\_035385.1|-retinol-binding protein 4 isoform 2 precursor [Mus musculus]  
g|244791354|ref|NP\_032516.2|-phosphatidylcholine-sterol acyltransferase precursor [Mus musculus]  
g|31543942|ref|NP\_033528.3|-vinculin [Mus musculus]  
g|161086891|ref|NP\_057913.2|-complement component 6 [Mus musculus]  
g|171906584|ref|NP\_067464.2|-coagulation factor XII [Mus musculus]  
g|274321952|ref|NP\_080588.3|-thyroxine-binding globulin precursor [Mus musculus]  
g|31982258|ref|NP\_032366.2|-insulin-like growth factor-binding protein complex acid labile subunit precursor [Mus musculus]  
g|188219651|ref|NP\_062320.2|-hepatocyte growth factor activator preproprotein [Mus musculus]  
g|58037159|ref|NP\_081338.1|-complement component C8 gamma chain precursor [Mus musculus]  
g|85701680|ref|NP\_001028349.1|-keratin, type II cytoskeletal 2 oral [Mus musculus]  
g|164518925|ref|NP\_075632.3|-complement C1r-A subcomponent precursor [Mus musculus]  
g|31981890|ref|NP\_033865.2|-beta-2-microglobulin precursor [Mus musculus]  
g|19882203|ref|NP\_598864.1|-interleukin-1 receptor accessory protein isoform b precursor [Mus musculus]  
g|226693331|ref|NP\_001152789.1|-interleukin-1 receptor accessory protein isoform c precursor [Mus musculus]  
g|226693333|ref|NP\_001152790.1|-interleukin-1 receptor accessory protein isoform d precursor [Mus musculus]  
g|6680421|ref|NP\_032390.1|-interleukin-1 receptor accessory protein isoform a precursor [Mus musculus]  
g|6755398|ref|NP\_035446.1|-serum amyloid A-4 protein precursor [Mus musculus]  
g|31543113|ref|NP\_032905.2|-platin-2 [Mus musculus]  
g|190684696|ref|NP\_033535.2|-villin-1 [Mus musculus]  
g|219521935|ref|NP\_001137161.1|-MHC class I like protein GS10 [Mus musculus]  
g|13385306|ref|NP\_080110.1|-vitamin K-dependent protein Z precursor [Mus musculus]  
g|147904569|ref|NP\_082180.2|-carboxypeptidase N subunit 2 [Mus musculus]  
g|6753100|ref|NP\_033825.1|-apolipoprotein C-II precursor [Mus musculus]  
g|33859809|ref|NP\_862897.1|-fibrinogen beta chain precursor [Mus musculus]  
g|31981562|ref|NP\_035229.2|-pyruvate kinase isozymes M1/M2 [Mus musculus]  
Cntm\_Q9DCD9|Q9DCD9\_MOUSE-Adult male kidney cDNA, RIKEN full-length enriched library, clone:0610041A01 product:IG ALPHA CHAIN C REGION homolog - Mus musculus (Mouse).  
g|22122613|ref|NP\_666213.1|-hyaluronan-binding protein 2 [Mus musculus]  
g|6680684|ref|NP\_031469.1|-protein AMBP precursor [Mus musculus]  
g|293597567|ref|NP\_001170778.1|-fructose-bisphosphate aldolase A isoform 1 [Mus musculus]  
g|293597569|ref|NP\_001170779.1|-fructose-bisphosphate aldolase A isoform 2 [Mus musculus]  
g|6671539|ref|NP\_031464.1|-fructose-bisphosphate aldolase A isoform 2 [Mus musculus]  
g|6680606|ref|NP\_032497.1|-keratin, type I cytoskeletal 19 [Mus musculus]  
g|224967112|ref|NP\_112441.2|-coagulation factor XIII B chain [Mus musculus]  
g|267844860|ref|NP\_001161177.1|-serine protease inhibitor A3A precursor [Mus musculus]  
g|190194418|ref|NP\_076331.2|-desmoplakin [Mus musculus]  
g|158635948|ref|NP\_067294.2|-N-acetyl(muramoyl)-L-alanine amidase precursor [Mus musculus]  
g|126723423|ref|NP\_001032948.2|-macrophage colony-stimulating factor 1 receptor precursor [Mus musculus]  
g|6755600|ref|NP\_035565.1|-extracellular superoxide dismutase [Cu-Zn] precursor [Mus musculus]  
g|309263192|ref|XP\_909773.4|-PREDICTED: complement component C7 [Mus musculus]  
g|309270498|ref|XP\_356827.7|-PREDICTED: complement component C7 [Mus musculus]  
g|114326449|ref|NP\_032849.2|-properdin precursor [Mus musculus]  
g|17647499|ref|NP\_058652.1|-hemoglobin subunit beta-2 [Mus musculus]  
g|6680806|ref|NP\_031589.1|-bisphosphoglycerate mutase [Mus musculus]  
g|164607147|ref|NP\_666127.2|-EGF-containing fibulin-like extracellular matrix protein 1 precursor [Mus musculus]  
g|30425250|ref|NP\_780706.1|-beta-actin-like protein 2 [Mus musculus]  
g|171184425|ref|NP\_035736.2|-tetranectin precursor [Mus musculus]  
g|19527078|ref|NP\_598623.1|-fibrinogen gamma chain precursor [Mus musculus]  
Cntm\_P01845|LAC3\_MOUSE-Ig lambda-3 chain C region - Mus musculus (Mouse).  
g|148232950|ref|NP\_061225.2|-plasma glutamate carboxypeptidase precursor [Mus musculus]  
g|28570174|ref|NP\_788262.1|-plasma glutamate carboxypeptidase precursor [Mus musculus]  
g|46849812|ref|NP\_034363.1|-fibronectin precursor [Mus musculus]  
g|13384648|ref|NP\_079571.1|-biotinidase [Mus musculus]  
g|254675205|ref|NP\_032269.3|-hepatocyte growth factor-like protein [Mus musculus]  
g|7656969|ref|NP\_056595.1|-complement factor H-related 1 [Mus musculus]  
g|73661202|ref|NP\_032005.1|-coagulation factor IX precursor [Mus musculus]  
g|13507644|ref|NP\_109628.1|-carboxypeptidase N catalytic chain precursor [Mus musculus]  
g|30725720|ref|NP\_849216.1|-hypothetical protein LOC98870 [Mus musculus]  
g|112421010|ref|NP\_032960.2|-vitamin K-dependent protein C [Mus musculus]  
g|112421031|ref|NP\_001036232.1|-vitamin K-dependent protein C [Mus musculus]  
g|112421046|ref|NP\_001036233.1|-vitamin K-dependent protein C [Mus musculus]  
Cntm\_P01843|LAC1\_MOUSE-Ig lambda-1 chain C region - Mus musculus (Mouse).  
g|262331536|ref|NP\_663569.2|-fibrinogen-like protein 1 precursor [Mus musculus]  
g|6678359|ref|NP\_033414.1|-transketolase [Mus musculus]  
g|6756041|ref|NP\_035870.1|-14-3-3 protein zeta/delta [Mus musculus]  
g|225543550|ref|NP\_034302.2|-coagulation factor VII precursor [Mus musculus]  
g|8850219|ref|NP\_059066.1|-haptoglobin precursor [Mus musculus]  
g|148277039|ref|NP\_783327.2|-alpha-2-macroglobulin-P precursor [Mus musculus]  
g|9055162|ref|NP\_061286.1|-apolipoprotein M [Mus musculus]  
g|6981086|ref|NP\_034647.1|-insulin-like growth factor-binding protein 4 precursor [Mus musculus]  
g|31981690|ref|NP\_112442.2|-heat shock cognate 71 kDa protein [Mus musculus]  
g|254750698|ref|NP\_001157134.1|-nucleobindin-1 isoform 1 [Mus musculus]  
g|309266677|ref|XP\_003086828.1|-PREDICTED: hypothetical protein LOC100505002 [Mus musculus]  
g|254540166|ref|NP\_071705.3|-78 kDa glucose-regulated protein precursor [Mus musculus]  
g|254540168|ref|NP\_001156906.1|-78 kDa glucose-regulated protein precursor [Mus musculus]  
g|194394234|ref|NP\_001123931.1|-transcobalamin-2 precursor [Mus musculus]  
g|194440742|ref|NP\_001123930.1|-transcobalamin-2 precursor [Mus musculus]

g| 7657639|ref|NP\_056564.1|-transcobalamin-2 precursor [Mus musculus]  
g| 158517825|ref|NP\_001103479.1|-apolipoprotein C-I precursor [Mus musculus]  
g| 6680704|ref|NP\_031495.1|-apolipoprotein C-I precursor [Mus musculus]  
g| 77682555|ref|NP\_035853.2|-xanthine dehydrogenase/oxidase [Mus musculus]  
g| 255069715|ref|NP\_077754.3|-cytosol aminopeptidase [Mus musculus]  
g| 38490561|ref|NP\_033998.2|-cadherin-5 precursor [Mus musculus]  
g| 6678321|ref|NP\_033395.1|-transforming growth factor-beta-induced protein ig-h3 precursor [Mus musculus]  
g| 6753960|ref|NP\_034396.1|-guanine deaminase [Mus musculus]  
g| 122425580|ref|NP\_083669.1|-keratin, type I cytoskeletal 24 [Mus musculus]  
g| 11968166|ref|NP\_071720.1|-cathepsin Z preproprotein [Mus musculus]  
g| 54112422|ref|NP\_001003893.1|-mannan-binding lectin serine protease 2 isoform 1 [Mus musculus]  
g| 88196796|ref|NP\_001034633.1|-major urinary protein 3 precursor [Mus musculus]  
g| 47523977|ref|NP\_998893.1|-keratin, type II cytoskeletal 72 [Mus musculus]  
g| 161702988|ref|NP\_033823.2|-apolipoprotein B precursor [Mus musculus]  
g| 28395018|ref|NP\_034723.1|-junction plakoglobin [Mus musculus]  
g| 7657429|ref|NP\_056599.1|-periostin [Mus musculus]  
g| 42415475|ref|NP\_035162.1|-protein disulfide-isomerase precursor [Mus musculus]  
g| 6678788|ref|NP\_032574.1|-mannosyl-oligosaccharide 1,2-alpha-mannosidase IA [Mus musculus]  
g| 30519997|ref|NP\_848760.1|-bleomycin hydrolase [Mus musculus]  
g| 47271507|ref|NP\_034934.2|-protein AF-10 [Mus musculus]  
g| 31982147|ref|NP\_775547.2|-GDH/6GL endoplasmic bifunctional protein [Mus musculus]  
g| 295293144|ref|NP\_001171256.1|-CD44 antigen isoform d precursor [Mus musculus]  
g| 295293146|ref|NP\_001171257.1|-CD44 antigen isoform e precursor [Mus musculus]  
g| 295293148|ref|NP\_001171258.1|-CD44 antigen isoform f precursor [Mus musculus]  
g| 85540466|ref|NP\_001034239.1|-CD44 antigen isoform b precursor [Mus musculus]  
g| 85540468|ref|NP\_001034240.1|-CD44 antigen isoform c precursor [Mus musculus]  
g| 85540471|ref|NP\_033981.2|-CD44 antigen isoform a precursor [Mus musculus]  
g| 160358823|ref|NP\_033820.2|-CD5 antigen-like precursor [Mus musculus]  
g| 6681297|ref|NP\_031945.1|-chymotrypsin-like elastase family member 2A precursor [Mus musculus]

**Common elements in "SHAM-LFD" and "OVX-LFD":**

g| 31543867|ref|NP\_035724.2|-metalloproteinase inhibitor 2 precursor [Mus musculus]  
g| 6753374|ref|NP\_033994.1|-cadherin-1 [Mus musculus]

**Common elements in "SHAM-LFD", "OVX-LFD" and "HFD-OVX":**

g| 285403616|ref|NP\_722487.2|-E3 ubiquitin-protein ligase TRAF7 isoform 3 [Mus musculus]  
g| 285403618|ref|NP\_001165584.1|-E3 ubiquitin-protein ligase TRAF7 isoform 1 [Mus musculus]  
g| 133922588|ref|NP\_001001892.2|-H-2 class I histocompatibility antigen, K-W28 alpha chain isoform 1 [Mus musculus]  
g| 9256624|ref|NP\_061358.1|-phosphoglycerate mutase 2 [Mus musculus]  
g| 114326546|ref|NP\_075907.2|-phosphoglycerate mutase 1 [Mus musculus]  
g| 254553458|ref|NP\_032181.2|-glucose-6-phosphate isomerase [Mus musculus]  
Cnrm\_P01872|MUC\_MOUSE-Ig mu chain C region secreted form - Mus musculus (Mouse).  
g| 160298213|ref|NP\_034474.4|-glutathione reductase, mitochondrial precursor [Mus musculus]  
g| 37700232|ref|NP\_032730.1|-nucleoside diphosphate kinase A [Mus musculus]  
g| 100815972|ref|NP\_034411.2|-gamma-glutamyl hydrolase precursor [Mus musculus]  
g| 111378400|ref|NP\_032369.2|-insulin-like growth factor-binding protein 3 [Mus musculus]  
g| 117606270|ref|NP\_001070997.1|-nucleoside diphosphate kinase B [Mus musculus]  
g| 6679078|ref|NP\_032731.1|-nucleoside diphosphate kinase B [Mus musculus]  
g| 82900057|ref|XP\_485703.2|-PREDICTED: nucleoside diphosphate kinase B-like [Mus musculus]  
g| 94375800|ref|XP\_980967.1|-PREDICTED: nucleoside diphosphate kinase B-like [Mus musculus]

**Common elements in "SHAM-LFD", "SHAM-HFD" and "HFD-OVX":**

g| 309264248|ref|XP\_003086233.1|-PREDICTED: dynein heavy chain 7, axonemal [Mus musculus]  
g| 309267418|ref|XP\_003084484.1|-PREDICTED: dynein heavy chain 7, axonemal [Mus musculus]  
g| 160358795|ref|NP\_001103968.1|-interferon alpha/beta receptor 2 isoform b precursor [Mus musculus]  
g| 160358845|ref|NP\_034639.2|-interferon alpha/beta receptor 2 isoform a precursor [Mus musculus]  
g| 31560083|ref|NP\_082497.2|-NEFA-interacting nuclear protein NIP30 [Mus musculus]  
g| 170295832|ref|NP\_031925.2|-extracellular matrix protein 1 precursor [Mus musculus]  
g| 149252547|ref|XP\_001472259.1|-PREDICTED: hypothetical protein LOC100039116 [Mus musculus]  
g| 309268101|ref|XP\_003084617.1|-PREDICTED: hypothetical protein LOC100039116 [Mus musculus]  
g| 309268103|ref|XP\_003084618.1|-PREDICTED: hypothetical protein LOC100039116 [Mus musculus]  
g| 124487403|ref|NP\_001074576.1|-helicase POLQ-like [Mus musculus]  
g| 11596855|ref|NP\_035768.1|-transferrin receptor protein 1 [Mus musculus]  
g| 255918225|ref|NP\_001157643.1|-myosin-6 [Mus musculus]  
g| 6754774|ref|NP\_034986.1|-myosin-6 [Mus musculus]  
g| 165932341|ref|NP\_291090.2|-chymotrypsin-like elastase family, member 1 [Mus musculus]  
g| 6678902|ref|NP\_032636.1|-72 kDa type IV collagenase precursor [Mus musculus]  
g| 13385294|ref|NP\_080099.1|-prenylcysteine oxidase precursor [Mus musculus]  
g| 31980752|ref|NP\_038765.2|-platelet-activating factor acetylhydrolase [Mus musculus]  
g| 115430101|ref|NP\_031602.3|-C4b-binding protein precursor [Mus musculus]  
g| 46309455|ref|NP\_035303.1|-vitamin K-dependent protein S precursor [Mus musculus]  
g| 309264020|ref|XP\_001474061.2|-PREDICTED: hypothetical protein LOC100045292 [Mus musculus]  
g| 85701905|ref|NP\_001028580.1|-RNA-binding protein 44 [Mus musculus]

**Common elements in "SHAM-HFD" and "HFD-OVX":**

g| 10946576|ref|NP\_067249.1|-C-X-C motif chemokine 10 precursor [Mus musculus]  
g| 6755112|ref|NP\_035255.1|-phospholipid transfer protein precursor [Mus musculus]  
g| 46559389|ref|NP\_997507.1|-angiotensin-converting enzyme isoform 1 [Mus musculus]  
g| 19527214|ref|NP\_598757.1|-apolipoprotein N [Mus musculus]  
g| 244792700|ref|NP\_032763.2|-neuropilin-1 precursor [Mus musculus]  
g| 236467129|ref|NP\_081046.1|-cell growth regulator with EF hand domain protein 1 isoform 1 [Mus musculus]  
g| 236467215|ref|NP\_001153621.1|-cell growth regulator with EF hand domain protein 1 isoform 2 [Mus musculus]  
g| 27229204|ref|NP\_083112.1|-di-N-acetylchitinase [Mus musculus]  
g| 93004085|ref|NP\_032813.3|-pericentrin [Mus musculus]  
g| 124486789|ref|NP\_001074778.1|-phosphoinositide 3-kinase regulatory subunit 4 [Mus musculus]  
g| 6996913|ref|NP\_031611.1|-annexin A2 [Mus musculus]  
g| 6753556|ref|NP\_034113.1|-cathepsin D precursor [Mus musculus]  
g| 56605682|ref|NP\_001008422.1|-splicing factor, arginine/serine-rich 19 [Mus musculus]  
g| 238018071|ref|NP\_001074401.2|-forkhead box protein K2 [Mus musculus]  
g| 124487350|ref|NP\_033868.3|-cholinesterase precursor [Mus musculus]

**Common elements in "SHAM-LFD" and "HFD-OVX":**

g| 33469117|ref|NP\_038941.1|-angiopoietin-related protein 3 precursor [Mus musculus]  
g| 77812697|ref|NP\_035782.3|-titin isoform N2-A [Mus musculus]  
g| 6679441|ref|NP\_032934.1|-peptidyl-prolyl cis-trans isomerase C [Mus musculus]  
g| 1225637487|ref|NP\_032512.2|-aminopeptidase N [Mus musculus]  
g| 309266074|ref|XP\_003086710.1|-PREDICTED: LOW QUALITY PROTEIN: dynein heavy chain 3, axonemal [Mus musculus]  
g| 309268955|ref|XP\_003084792.1|-PREDICTED: LOW QUALITY PROTEIN: dynein heavy chain 3, axonemal [Mus musculus]  
g| 31981310|ref|NP\_036190.2|-B-cell receptor-associated protein 31 [Mus musculus]  
g| 50054054|ref|NP\_848788.2|-follistatin-related protein 5 precursor [Mus musculus]  
g| 148226524|ref|NP\_032581.2|-mannan-binding lectin serine protease 1 [Mus musculus]  
g| 110625894|ref|NP\_082346.1|-probable alpha-ketoglutarate-dependent dioxygenase ABH4 [Mus musculus]
